# Supplementary material
Source: PubMed Central journal article supplement (PMC6140573)
Supplement: CJN.13701217SupplementaryData.pdf [file CJN.13701217SupplementaryData.pdf]

Supplemental material is neither peer-reviewed nor thoroughly edited by CJASN. The authors alone are responsible for the accuracy and presentation of the material.

## **Supplemental Material**

### **IgA Nephropathy Susceptibility Loci and Disease Progression**

Manman Shi, Yan Ouyang, Mingxin Yang, Meng Yang, Xiaoyan Zhang, Wei Huang, Weiming Wang, Zhaohui Wang, Wen Zhang, Xiaonong Chen, Xiaoxia Pan, Hong Ren, Nan Chen, Jingyuan Xie

*Department of Nephrology, Institute of Nephrology, Shanghai Ruijin Hospital, Shanghai Jiao Tong University School of Medicine, Shanghai, China*

*Correspondence: Jingyuan Xie, MD, PhD, Department of Nephrology, Institute of Nephrology, Shanghai Ruijin Hospital, Shanghai Jiao Tong University School of Medicine, Shanghai (200001), China. Tel. 021-64370045-665233, Fax: 021-64456419, E-mail: nephroxie@163.com*

Supplemental material is neither peer-reviewed nor thoroughly edited by CJASN. The authors alone are responsible for the accuracy and presentation of the material.

**Table S1 | Linkage Disequilibrium Analyses Between the Selected Single Nucleotide Polymorphisms.**

|            | rs1883414 | rs7763262 | rs9275224    | rs2856717    | rs9275596 | rs2738048    | rs12716641 | rs9314614 | rs2071543 | rs2412971 | rs3803800 | rs17019602 | rs11150612 | rs2033562 | rs2074038 | rs7634389 |  |
|------------|-----------|-----------|--------------|--------------|-----------|--------------|------------|-----------|-----------|-----------|-----------|------------|------------|-----------|-----------|-----------|--|
| rs1883414  |           | 0.76      | 0.71         | 0.50         | 0.50      | 0.23         | 0.21       | 0.71      | 0.90      | 0.90      | 0.54      | 0.29       | 0.35       | 0.58      | 0.50      | 0.58      |  |
| rs7763262  | 0.01      |           | 0.03         | 0.09         | 0.16      | 0.16         | 0.50       | 0.42      | 0.01      | 0.50      | 0.23      | 0.71       | 0.81       | 0.90      | 0.12      | 0.71      |  |
| rs9275224  | 0.05      | 0.2       |              | <0.001       | 0.02      | 0.23         | 0.46       | 0.26      | 0.09      | 0.62      | 1         | 0.76       | 0.95       | 0.76      | 0.11      | 0.67      |  |
| rs2856717  | 0.02      | 0.03      | <b>0.38*</b> |              | <0.001    | 0.90         | 0.76       | 0.85      | 0.08      | 0.85      | 0.95      | 0.38       | 0.81       | 0.54      | 0.02      | 0.21      |  |
| rs9275596  | 0.01      | 0.04      | 0.18         | <b>0.53*</b> |           | 0.90         | 0.50       | 0.95      | 0.14      | 0.95      | 0.67      | 0.26       | 0.81       | 0.71      | 0.05      | 0.07      |  |
| rs2738048  | 0         | 0.02      | 0            | 0            | 0         |              | <0.001     | 0.04      | 0.42      | 0.42      | 0.76      | 0.12       | 0.62       | 0.16      | 0.71      | 0.54      |  |
| rs12716641 | 0         | 0.01      | 0            | 0            | 0         | <b>0.21*</b> |            | 0.01      | 0.62      | 0.62      | 1         | 0.11       | 0.42       | 0.08      | 0.76      | 0.11      |  |
| rs9314614  | 0         | 0         | 0            | 0            | 0         | 0            | 0.01       |           | 0.46      | 0.90      | 0.90      | 0.76       | 0.76       | 0.23      | 0.95      | 0.50      |  |
| rs2071543  | 0         | 0.01      | 0.01         | 0.05         | 0.07      | 0.01         | 0          | 0         |           | 0.38      | 0.90      | 0.67       | 0.85       | 0.76      | 0.11      | 0.29      |  |
| rs2412971  | 0         | 0         | 0            | 0            | 0         | 0            | 0          | 0         | 0         |           | 0.90      | 0.85       | 0.35       | 0.76      | 0.67      | 0.67      |  |
| rs3803800  | 0         | 0         | 0            | 0            | 0         | 0            | 0          | 0         | 0         | 0         |           | 0.76       | 0.58       | 0.76      | 0.58      | 0.76      |  |
| rs17019602 | 0         | 0         | 0            | 0.01         | 0.01      | 0            | 0          | 0         | 0         | 0         | 0         |            | 0.26       | 0.81      | 0.38      | 0.46      |  |
| rs11150612 | 0.01      | 0         | 0            | 0            | 0         | 0            | 0          | 0         | 0         | 0         | 0         | 0.26       |            | 1         | 0.38      | 0.54      |  |
| rs2033562  | 0         | 0         | 0            | 0            | 0         | 0            | 0          | 0.01      | 0         | 0         | 0.01      | 0          | 0          |           | 1         | 0.46      |  |
| rs2074038  | 0         | 0         | 0            | 0            | 0         | 0            | 0          | 0         | 0         | 0         | 0         | 0          | 0.01       | 0         |           | 0.62      |  |
| rs7634389  | 0         | 0         | 0            | 0            | 0         | 0.01         | 0.01       | 0         | 0         | 0         | 0         | 0          | 0          | 0         | 0         | 0         |  |

Linkage disequilibrium structure between SNPs in our study:  $r^2$  (below the diagonal) and P value (above the diagonal).

\*Significant by Bonferroni-adjusted P (P value <0.05/16).

Supplemental material is neither peer-reviewed nor thoroughly edited by CJASN. The authors alone are responsible for the accuracy and presentation of the material.

**Table S2 | Haplotype analyses of the *HLA-DQ/DR* region rs7763262, rs9275224, rs2856717 and rs9275596.**

| Haplotype | Frequency |                                |                                    | OR (95% CI)        |
|-----------|-----------|--------------------------------|------------------------------------|--------------------|
|           | Total     | Progressive group <sup>a</sup> | Non-progressive group <sup>b</sup> |                    |
| CGCT      | 0.65      | 0.65                           | 0.66                               | ref                |
| TATC      | 0.05      | 0.06                           | 0.04                               | 0.88 (0.30, 2.59)  |
| CATC      | 0.05      | 0.06                           | 0.05                               | 0.62 (0.18, 2.12)  |
| CGCC      | 0.04      | 0.06                           | 0.03                               | 2.98 (0.73, 12.20) |
| CATT      | 0.04      | 0.07                           | 0.03                               | 2.45 (0.89, 6.70)  |
| TACT      | 0.07      | 0.05                           | 0.08                               | 0.70 (0.25, 1.91)  |
| CACT      | 0.05      | 0.03                           | 0.05                               | 0.55 (0.16, 1.93)  |
| TGCT      | 0.05      | 0.03                           | 0.06                               | 0.45 (0.11, 1.78)  |

Frequency of progressive group <sup>a</sup> was the haplotype frequency of progressive patients (progressed to combined outcome within 5 years).

Frequency of non-progressive group <sup>b</sup> was the haplotype frequency of non-progressive patients (combined-outcome free within 5 years).

The most common haplotype (CGCT) was used for reference.

Supplemental material is neither peer-reviewed nor thoroughly edited by CJASN. The authors alone are responsible for the accuracy and presentation of the material.

**Table S3 | Comparison of Different Genetic Risk Scores Equations on Disease Prediction**

| Genetic Risk Score Equations                     | R Square | C-statistics (95%CI) | Model 1           |        | Model 2           |      | Model 3           |      |
|--------------------------------------------------|----------|----------------------|-------------------|--------|-------------------|------|-------------------|------|
|                                                  |          |                      | HR (95%CI)        | P      | HR (95%CI)        | P    | HR (95%CI)        | P    |
| Genetic Risk Score <sup>a</sup>                  | 3.10%    | 0.63 (0.55, 0.72)    | 1.65 (1.29, 2.11) | <0.001 | 1.29 (1.03, 1.62) | 0.03 | 1.35 (1.03, 1.77) | 0.03 |
| Standardized Genetic Risk Score <sup>b</sup>     | 0.20%    | 0.45 (0.36, 0.54)    | 0.76 (0.46, 1.26) | 0.28   | 0.93 (0.58, 1.50) | 0.76 | 1.01 (0.59, 1.70) | 0.99 |
| Unweighted 9-SNP Genetic Risk Score <sup>c</sup> | 0.30%    | 0.53 (0.44, 0.63)    | 0.95 (0.87, 1.03) | 0.23   | 1.02 (0.94, 1.11) | 0.57 | 0.99 (0.90, 1.10) | 0.87 |

Genetic Risk Score<sup>a</sup>: unweighted 4-SNP genetic risk score equation derived from this study.

Standardized Genetic Risk Score<sup>b</sup>: weighted 15-SNP genetic risk score equation from Kiryluk K et al (*Kiryluk K et al, Nat Genet. 2014*)

Standardized Genetic Risk =

$$[0.16 \times N(\text{rs17019602:G}) - 0.22 \times N(\text{rs7763262:T}) - 0.29 \times N(\text{rs9275224:A}) + 0.48 \times N(\text{rs2856717:T}) - 0.42 \times N(\text{rs9275596:C}) - 0.17 \times N(\text{rs2071543:A}) - 0.19 \times N(\text{rs1883414:T}) - 0.06 \times N(\text{rs2738048:C}) + 0.1 \times N(\text{rs11150612:A}) + 0.15 \times N(\text{rs3803800:A}) + 0.17 \times N(\text{rs2412971:A}) - \text{Worldwide Mean}] / (\text{Worldwide SD})$$

N = number of reference alleles for each SNP (0, 1, or 2 per individual genotype).

Worldwide Mean = -0.002188 = mean risk score based on the HGDP data.

Worldwide SD = 0.08002831 = risk score standard deviation based on the HGDP data.

Unweighted 9-SNP Genetic Risk Score<sup>c</sup>: unweighted 9-SNP genetic risk score equation from Zhou et al (*Zhou et al, SCI REP. 2014*)

Model 1: without adjustment.

Model 2: adjusted by the clinical model from Xie et al (*Xie et al, AJKD 2018, Epub ahead of print*).

Model 3: adjusted by the clinical and pathological model from Xie et al (*Xie et al, AJKD 2018, Epub ahead of print*).

HR, hazard ratio; CI: confidential interval; SNP: single nucleotide polymorphism.

Supplemental material is neither peer-reviewed nor thoroughly edited by CJASN. The authors alone are responsible for the accuracy and presentation of the material.

**Table S4 | Reclassification table of models with and without genetic risk score to predict 5-year progression risk.**

**a) Reclassification table of original clinical risk model alone and combined with genetic risk score**

| Without genetic risk score      | With genetic risk score |       |      | Reclassified   |                | Net correctly reclassified |
|---------------------------------|-------------------------|-------|------|----------------|----------------|----------------------------|
|                                 | <5%                     | 5~10% | >10% | Increased risk | Decreased risk |                            |
| Individuals without progression |                         |       |      |                |                |                            |
| <5%                             | 0                       | 0     | 0    | 9              | 24             | 9.55%                      |
| 5~10%                           | 11                      | 56    | 9    |                |                |                            |
| >10%                            | 0                       | 13    | 68   |                |                |                            |
| Individuals with progression    |                         |       |      |                |                |                            |
| <5%                             | 0                       | 0     | 0    | 2              | 0              | 4%                         |
| 5~10%                           | 0                       | 2     | 2    |                |                |                            |
| >10%                            | 0                       | 0     | 46   |                |                |                            |
| Combined                        |                         |       |      |                |                | 13.55% (4.68%-22.43%)      |

**b) Reclassification table of original clinical-pathological risk model alone and combined with genetic risk score**

| Without genetic risk score      | With genetic risk score |       |      | Reclassified   |                | Net correctly reclassified |
|---------------------------------|-------------------------|-------|------|----------------|----------------|----------------------------|
|                                 | <5%                     | 5~10% | >10% | increased risk | Decreased risk |                            |
| Individuals without progression |                         |       |      |                |                |                            |
| <5%                             | 0                       | 0     | 0    | 0              | 29             | 29%                        |
| 5~10%                           | 0                       | 0     | 0    |                |                |                            |
| >10%                            | 0                       | 29    | 71   |                |                |                            |
| Individuals with progression    |                         |       |      |                |                |                            |
| <5%                             | 0                       | 0     | 0    | 0              | 0              | 0                          |
| 5~10%                           | 0                       | 0     | 0    |                |                |                            |
| >10%                            | 0                       | 0     | 43   |                |                |                            |
| Combined                        |                         |       |      |                |                | 29% (20.11%-37.89%)        |
